# Supplementary material
Source: publisher figshare collection journal article supplement (https://sage.figshare.com/ndownloader/files/14376035)
Supplement: Supplementary file 1 [file 14376035]

## **Appendix 2: Characteristics of 24 non-randomized controlled trials (non-RCTs)**

| <b>Author/<br/>Year of<br/>publica-<br/>tion</b> | <b>Study title</b>                                                                                                                          | <b>Study<br/>location</b>   | <b>Study design<br/>and duration<br/>(mean/median)</b>              | <b>Participants</b>                  | <b>Gender (male,<br/>%) and age<br/>(mean/median)</b> | <b>Treatment groups</b>                                                                                                         | <b>Steroid regimen</b>                                                             |
|--------------------------------------------------|---------------------------------------------------------------------------------------------------------------------------------------------|-----------------------------|---------------------------------------------------------------------|--------------------------------------|-------------------------------------------------------|---------------------------------------------------------------------------------------------------------------------------------|------------------------------------------------------------------------------------|
| Arends<br>2014                                   | Induction therapy with short-term high-dose intravenous cyclophosphamide followed by mycophenolate mofetil in proliferative lupus nephritis | Netherlands, multi-centres  | Uncontrolled cohort<br><br>3.8 years                                | 71 patients with LN class III and IV | Male 23%<br><br>Age 36.6                              | IV CYC 0.75g/m <sup>2</sup> monthly for 6 months, followed by MMF 2g/day for 18 months then AZA 2mg/kg/day                      | Prednisolone 1mg/kg/day for 4 weeks then tapered                                   |
| Moroni<br>2014                                   | Rituximab vs mycophenolate and vs cyclophosphamide pulses for induction therapy of active lupus nephritis: a clinical observational study   | Italy, 2 centres            | Observational, open prospective study<br><br>12 months <sup>a</sup> | 54 patients with LN class III-V      | Male 13%<br><br>Age 31.4                              | IV RTX 1g versus MMF 2-2.5g/day versus IV CYC 0.5g fortnightly for 3 months; followed by maintenance therapies of AZA/ MMF/ CSA | IV MP 3 doses, followed by prednisolone 0.5-0.75mg/kg/day for 4 weeks then tapered |
| Rivera<br>2014                                   | Mycophenolate in Refractory and Relapsing Lupus Nephritis                                                                                   | Spain, multi-centres        | Retrospective<br><br>30 months                                      | 85 patients with LN class II-V       | Male 20%<br><br>Age 24 vs 26                          | MMF 1g/day (median) to treat refractory and relapsing LN (previously treated with CYC/ AZA/ CSA)                                | Prednisolone 20mg/day (median) then tapered                                        |
| Bozzolo<br>2013                                  | Efficacy and toxicity of treatments for nephritis in a series of consecutive lupus patients                                                 | Italy, single centre        | Retrospective<br><br>110 months                                     | 40 patients with LN class III-V      | Male 12.5%<br><br>Age 35                              | Induction: IV CYC 750-1g/m <sup>2</sup> 6-11mthly (95%) or MMF 2g/day<br>Maintenance: CYP/ MMF/ AZA/ CSA/ TAC/ RTX              | IV MP, followed by prednisolone 0.5-1g/kg/day 4weeks then tapered                  |
| Ayodele<br>2013                                  | Long-term renal outcome and                                                                                                                 | South Africa, single centre | Retrospective                                                       | 66 patients with LN class            | Male 8%                                               | Induction: oral CYC 1-2mg/kg/d (82%) or IV                                                                                      | IV MP, followed by prednisolone 0.5-                                               |

|             |                                                                                                                                                                              |                               |                                                                |                                 |                            |                                                                                                   |                                                                                                                                                    |
|-------------|------------------------------------------------------------------------------------------------------------------------------------------------------------------------------|-------------------------------|----------------------------------------------------------------|---------------------------------|----------------------------|---------------------------------------------------------------------------------------------------|----------------------------------------------------------------------------------------------------------------------------------------------------|
|             | complications in South Africans with proliferative lupus nephritis                                                                                                           |                               | 56 months                                                      | III-IV                          | Age 30.2                   | 0.5-1g/m <sup>2</sup> or AZA<br>Maintenance: AZA/ IV<br>CYC/ MMF                                  | 1mg/kg/day then tapered                                                                                                                            |
| Condon 2013 | Prospective observational single-centre cohort study to evaluate the effectiveness of treating lupus nephritis with rituximab and mycophenolate mofetil but no oral steroids | United Kingdom, single centre | Prospective observational uncontrolled cohort<br><br>163 weeks | 50 patients with LN class III-V | Male 22%<br><br>Age 45     | Rituximab 1g D1 and D15 plus MMF 1g/day                                                           | IV MP 500mg D1 and D15, without oral steroids                                                                                                      |
| Moroni 2013 | Progressive improvement of patient and renal survival and reduction of morbidity over time in patients with lupus nephritis (LN) followed for 20 years                       | Italy, single centre          | Retrospective<br><br>21.9 years                                | 89 patients with LN class II-V  | Male 5.6%<br><br>Age 28.8  | Induction: oral CYC/ chlorambucil/ AZA<br>Maintenance: AZA/ CSA                                   | Prednisolone 1mg/kg/day 1-2mths then tapered or IV methylprednisolone 0.5-1g x3 followed by prednisolone 0.5-0.75mg/kg/day 1-2 months then tapered |
| Yap 2013    | Long-term data on corticosteroids and mycophenolate mofetil treatment in lupus nephritis                                                                                     | Hong Kong, single centre      | Retrospective<br><br>91 months                                 | 65 patients with LN class III-V | Male 13.8%<br><br>Age 35   | Induction: MMF 2g/day<br>Maintenance: MMF/ AZA/ CSA                                               | Prednisolone 0.8mg/kg/day then tapered                                                                                                             |
| Rivera 2013 | Mycophenolate as maintenance therapy for lupus nephritis with impaired renal function                                                                                        | Spain, multi-centres          | Retrospective<br><br>24 months                                 | 56 patients with LN class II-V  | Male 17.9%<br><br>Age 30.3 | Induction: IV CYC pulses 6 doses<br>Maintenance: MMF 1g/day (median)                              | Prednisolone 15mg/day (mean) then tapered                                                                                                          |
| Wang 2012   | Tacrolimus versus cyclophosphamide as treatment for diffuse proliferative or membranous lupus                                                                                | China, single centre          | Controlled prospective cohort study<br><br>Induction           | 40 patients with LN class III-V | Male 20%<br><br>Age 33.9   | TAC 0.04-0.08mg/kg/day versus monthly IV CYC 0.75g/m <sup>2</sup> for 6 months then AZA 100mg/day | Prednisolone 0.8mg/kg/day for 4 weeks and tapered                                                                                                  |

|                      |                                                                                                                                                        |                        |                                                         |                                    |                             |                                                                                                                                                                    |                                                                                     |
|----------------------|--------------------------------------------------------------------------------------------------------------------------------------------------------|------------------------|---------------------------------------------------------|------------------------------------|-----------------------------|--------------------------------------------------------------------------------------------------------------------------------------------------------------------|-------------------------------------------------------------------------------------|
|                      | nephritis: a non-randomized prospective cohort study                                                                                                   |                        | 12 months <sup>a</sup>                                  |                                    |                             |                                                                                                                                                                    |                                                                                     |
| Fischer-Betz 2012    | Renal outcome in patients with lupus nephritis using a steroid-free regimen of monthly intravenous cyclophosphamide: a prospective observational study | Germany, single centre | Prospective observational uncontrolled<br><br>24 months | 40 patients with LN class III-V    | Male 17.5%<br>Age 29.7      | IV CYC 0.5g/m <sup>2</sup> 6 monthly 6 doses then quarterly 6 doses                                                                                                | Prednisolone 23.9mg/day (mean starting dose) – to control extra-renal manifestation |
| Dhir 2012            | Long-term outcome of lupus nephritis in Asian Indians                                                                                                  | India, single centre   | Retrospective<br><br>6 years                            | 188 patients with LN class II-V    | Male 8%<br>Age 23.6         | Class III/ IV:<br>Induction: IV CYC 7 pulses 0.75-1g/m <sup>2</sup> monthly<br>Maintenance: IV CYC quarterly 6 pulses/ AZA<br><br>Class II and V: steroids +/- AZA | Prednisolone 1mg/kg/day for 6-8 weeks then tapered                                  |
| Rivera 2012          | Mycophenolate as induction therapy in lupus nephritis with renal function impairment                                                                   | Spain, multi-centres   | Retrospective<br><br>24 months                          | 90 patients with LN class II-V     | Male NA<br>Age 32.1         | MMF 2g/day (median)                                                                                                                                                | Prednisolone 30mg/day (median) then tapered                                         |
| Bitencourt Dias 2011 | Prednisone monotherapy induced remission in a group of patients with membranous lupus nephritis                                                        | Brazil, 2 centres      | Retrospective<br><br>63.3 months                        | 53 patients with LN class III+V, V | Male 0%<br>Age 33.2 vs 29.1 | Prednisolone alone versus prednisolone plus IV CYC 750mg/m <sup>2</sup> monthly 3-12 doses or AZA 1.5mg/kg/day                                                     | Prednisolone 1mg/kg/day for 8 weeks then tapered                                    |
| Laskari 2011         | Long term follow up after tapering mycophenolate mofetil                                                                                               | Greece, single centre  | Retrospective<br><br>30 months                          | 44 patients with LN class III-V    | Male 13.6%<br>Age 30        | MMF 2g/day, fast versus slow tapering                                                                                                                              | Prednisolone 0.5-1mg/kg/day for 4 weeks then tapered                                |

|             |                                                                                                                                                      |                          |                                                 |                                  |                                |                                                                                                                                       |                                                                                                                        |
|-------------|------------------------------------------------------------------------------------------------------------------------------------------------------|--------------------------|-------------------------------------------------|----------------------------------|--------------------------------|---------------------------------------------------------------------------------------------------------------------------------------|------------------------------------------------------------------------------------------------------------------------|
|             | during maintenance treatment for proliferative lupus nephritis                                                                                       |                          |                                                 |                                  |                                |                                                                                                                                       |                                                                                                                        |
| Tang 2008   | Effects of mycophenolate mofetil for patients with crescentic lupus nephritis                                                                        | China, single centre     | Retrospective<br>38.5 months vs 41.1 months     | 52 patients with crescentic LN   | Male 17.3%<br>Age 27.3 vs 30.4 | Induction: MMF 1.5-2g/day versus IV CYC 0.5-0.75g/m <sup>2</sup> monthly<br><br>Maintenance (after remission): tripterygium wilfordii | IV MP, followed by prednisolone 0.6-0.8mg/kg/day then tapered                                                          |
| Lu 2008     | A prospective multicentre study of mycophenolate mofetil combined with prednisolone as induction therapy in 213 patients with active lupus nephritis | China, multi-centres     | Prospective uncontrolled cohort<br><br>24 weeks | 213 patients with LN class III-V | Male 14.1%<br>Age 30           | MMF 1-2g/day                                                                                                                          | Prednisolone 52.8mg/day (mean) then tapered                                                                            |
| Sun 2008    | Long-term outcome of Chinese patients with membranous lupus nephropathy                                                                              | China, single centre     | Retrospective<br>77.6 months                    | 100 patients with LN class V     | Male 10%<br>Age 32             | Induction: tripterygium wilfordii/ CSA/ CYC/ FK/ MMF/ steroids alone<br><br>Maintenance: tripterygium wilfordii                       | Prednisolone dose was not described                                                                                    |
| Moroni 2007 | The long-term outcome of 93 patients with proliferative lupus nephritis                                                                              | Italy, single centre     | Observational<br>181 months                     | 93 patients with LN class III-V  | Male 8.6%<br>Age 27.3          | Induction: oral CYC/ chlorambucil/ AZA<br>Maintenance: AZA/ CSA/ MMF/ steroids alone                                                  | Prednisolone 1-2mg/kg/day for 4 weeks then tapered or IV MP 3 doses followed by prednisolone 0.5-1mg/kg/day 1-2 months |
| Mok 2006    | Long-term outcome of diffuse proliferative                                                                                                           | Hong Kong, multi-centres | Retrospective                                   | 212 apteints with LN class       | Male 11%                       | Induction: oral CYC 1-2mg/kg/day 6-9                                                                                                  | Prednisone 0.5-1mg/kg/day or                                                                                           |

|            |                                                                                                                                                    |                                         |                                                                                       |                                           |                         |                                                                                                                                                            |                                                 |
|------------|----------------------------------------------------------------------------------------------------------------------------------------------------|-----------------------------------------|---------------------------------------------------------------------------------------|-------------------------------------------|-------------------------|------------------------------------------------------------------------------------------------------------------------------------------------------------|-------------------------------------------------|
|            | lupus glomerulonephritis treated with cyclophosphamide                                                                                             |                                         | 1873 patient-years                                                                    | IV/ DPGN                                  | Age 30.9                | months or IV CYC 0.5g/m <sup>2</sup> 6 dose then 3 monthly 6 doses<br>Maintenance: AZA/ MMF/ CSA                                                           | equivalent for 6-8 weeks                        |
| Liang 2004 | Clinical predictors of recovery and complications in the management of recent-onset renal failure in lupus nephritis: a Chinese experience         | China, single centre                    | Retrospective<br>6 months                                                             | 162 patients with LN requiring dialysis   | Male 19.1%<br>Age 28.75 | IV CYC high dose (>=1g/m <sup>2</sup> /month) versus low dose (<1g/m <sup>2</sup> /month)                                                                  | IV MP then prednisolone 0.5-1g/kg/day           |
| Mok 2001   | Treatment of diffuse proliferative lupus glomerulonephritis: a comparison of two cyclophosphamide-containing regimens                              | Hong Kong, two centres                  | Prospective controlled observational study<br><br>Induction and maintenance 24 months | 43 patients with LN class IV (WHO)        | Male 3.6%<br>Age 31.8   | IV CYC 0.75-1g/m <sup>2</sup> monthly 6 pulses then quarterly 6 pulses versus oral cyclophosphamide 50-100mg/day followed by AZA 100mg/day                 | Prednisolone 1mg/kg/day 8-10 weeks then tapered |
| Mok 2002   | Outcome and prognostic indicators of diffuse proliferative lupus glomerulonephritis treated with sequential oral cyclophosphamide and azathioprine | Hong Kong, single centre                | Retrospective<br>4 years (median)                                                     | 55 patients with diffuse proliferative LN | Male 14.5%<br>Age 31.1  | Oral CYC 1-2mg/kg/day 6-9 months followed by AZA 50-100mg/day                                                                                              | Prednisolone 1mg/kg/day 8-10 weeks then tapered |
| Illei 2001 | Combination therapy with pulse cyclophosphamide plus pulse methylprednisolone improves long-term renal outcome without adding toxicity in          | United States of America, single centre | Retrospective (extended trial of Gourley 1996)<br><br>65 patients                     | 65 patients with LN class III/IV          | Male 17%<br>Age NA      | IV MP 1g/m <sup>2</sup> 3 days then monthly one year versus IV CYC 0.5-1g/m <sup>2</sup> monthly 6 boluses then quarterly versus combination of MP and CYC | Prednisolone 0.5kg/day 4 weeks then tapered     |

|  |                                  |  |  |  |  |  |  |
|--|----------------------------------|--|--|--|--|--|--|
|  | patients with lupus<br>nephritis |  |  |  |  |  |  |
|--|----------------------------------|--|--|--|--|--|--|

Abbreviations:  
LN, lupus nephritis; CYC, cyclophosphamide; MMF, mycophenolate mofetil; TAC, tacrolimus; AZA, azathioprine; RTX, rituximab; CSA, cyclosporine; IV, intravenous; MP, methylprednisolone, NA, not available.

<sup>a</sup>Duration refers to the time infective complications being studies
